## **The role of vertical symbiont transmission in altering cooperation and fitness of coral- *Symbiodinium* symbioses**

Carly D Kenkel<sup>a,1</sup> and Line K Bay<sup>a,2</sup>

<sup>a</sup>Australian Institute of Marine Science, PMB No 3, Townsville MC, Queensland 4810,  
Australia

<sup>1</sup>Corresponding author, email: [carly.kenkel@gmail.com](mailto:carly.kenkel@gmail.com) or [c.kenkel@aims.gov.au](mailto:c.kenkel@aims.gov.au); phone:  
+61 07 4753 4268; fax: +61 07 4772 5852

<sup>2</sup>Email: [L.Bay@aims.gov.au](mailto:L.Bay@aims.gov.au)

RUNNING TITLE: Vertical symbiont transmission in coral

KEYWORDS: Symbiosis, transmission mode, reef corals, calcification, bleaching,  
metabolite transfer

1 ABSTRACT

2 Cooperation between species is regularly observed in nature, but understanding of  
3 what promotes, maintains and strengthens these relationships is limited. We used a  
4 phylogenetically controlled design to investigate one potential driver in reef-building corals:  
5 variation in symbiont transmission mode. Two of three species pairs conformed to theoretical  
6 predictions stating that vertical transmission (VT) should maximize whole-organism fitness.  
7 *Montipora aequituberculata* (VT) exhibited greater net photosynthetic function, calcification  
8 rate and bleaching tolerance than its horizontally transmitting (HT) sister taxa *Acropora*  
9 *millepora*. Similar performance was observed in *Porites lobata* (VT) and *Goniopora columna*  
10 (HT), with the VT species showing higher fitness. However, *Galaxea archelia* (VT) was  
11 consistently out-performed by its HT congener *G. astreata*. Cooperation, quantified with  
12 radioisotope tracing of carbon sharing, was more variable across pairs, perhaps reflecting  
13 different optimization strategies necessary to maximize holobiont fitness. Variation in fitness  
14 patterns between VT and HT corals was not explained by differences in *Symbiodinium*  
15 communities among species; however, reproductive mode may play a role as both *M.*  
16 *aequituberculata* and *P. lobata* transmit symbionts transovarially whereas *G. archelia* broods  
17 larvae. Taken together, transmission mode may be an important driver of symbiosis evolution  
18 in some corals, but additional evolutionary mechanisms should be investigated.

19

20

21

22

23

## 24 1. INTRODUCTION

25 Inter-species cooperation has played a fundamental role in the evolution and  
26 diversification of life [1-4]. A continuum of relationships can be found in nature, ranging  
27 from fleeting facultative interactions, such as cleaner wrasse and their reef-fish clientele [5]  
28 to life-long partnerships, as in *Rhizobium*-legume symbioses [6], to fully integrated  
29 organelles, like mitochondria and chloroplasts within eukaryotic cells [7]. Yet despite  
30 pervasive examples across all taxonomic levels, surprisingly little is known about the factors  
31 that promote increased integration of inter-species partnerships and natural experimental  
32 systems for studying evolutionary transitions among cooperative states are lacking [8, 9].

33 Despite the positive connotation of “cooperative”, these relationships are better  
34 defined as a spectrum that ranges from negative parasitic interactions to mutually beneficial  
35 symbioses, both within the context of a focal inter-species interaction and when comparing  
36 relationships across taxa [10-13]. One factor predicted to influence the level of cooperation  
37 between partners is the mode of symbiont transmission [14, 15]. Two transmission modes  
38 predominate: symbionts can be acquired horizontally from the local environment, usually  
39 during a defined larval stage, or vertically from parents, typically through the maternal germ  
40 line (reviewed in [16]). Virulence theory suggests that horizontal transmission allows  
41 symbionts to adopt selfish strategies, potentially harmful to the host [17]. A transition from  
42 horizontal to vertical transmission is predicted to align the reproductive interests of partners  
43 (via partner-fidelity feedback *sensu* [18]) and optimize resource sharing to maximize  
44 holobiont (the combination of host and symbiont) fitness [19-21]. Vertical transmission also  
45 results in the loss of an aposymbiotic life-stage for both hosts and symbionts; consequently,  
46 its evolution has also been proposed as a mechanism underpinning major transitions in  
47 individuality [9].

48 Experimental manipulations of transmission mode have provided empirical support  
49 for a reduction in pathogen virulence under enforced vertical transmission scenarios [22-25].  
50 Bacteriophages forced into vertical transmission evolved lower virulence and lost the  
51 capacity to transmit horizontally [22]. Similarly, *Symbiodinium microadriaticum* under an  
52 experimentally enforced horizontal transmission regime proliferated faster within their  
53 *Cassiopea* jellyfish hosts while reducing host reproduction and growth [23]. However,  
54 studies quantifying the fitness consequences of shifts in transmission mode in natural systems  
55 remain rare, with Herre's demonstration of a negative relationship between vertical  
56 transmission and virulence in nematodes that parasitize fig wasps a notable exception [26].

57 Reef-building corals are a potential system in which to study naturally occurring  
58 transitions in transmission mode in a mutualistic symbiosis. Corals (Cnidaria: Anthozoa:  
59 Scleractinia) are colonial animals that harbour intracellular populations of dinoflagellate  
60 algae in the genus *Symbiodinium*. This symbiosis is considered obligate as the breakdown of  
61 the relationship between host animals and their intracellular *Symbiodinium* algae, commonly  
62 known as coral bleaching, has major fitness consequences for both partners, and can be lethal  
63 (reviewed in [27]). This inter-species partnership is ancient (evolved ~ 250 MYA [28]),  
64 prolific (600+ species worldwide [29]), and constitutes the foundation of one of the most bio-  
65 diverse and productive ecosystems on the planet. The majority of coral species (~85%)  
66 acquire their *Symbiodinium* horizontally from the local environment in each generation [30].  
67 However, vertical transmission has evolved repeatedly across lineages, such that both  
68 transmission strategies can be exhibited by different coral species within the same genus [31-  
69 33].

70 While corals offer a potential opportunity to further our understanding of the  
71 evolution of symbiont transmission mode, there are also pressing applied reasons to study this  
72 relationship. Climate change and other anthropogenic processes threaten corals because of the

73 sensitivity of the coral-dinoflagellate symbiosis to environmental stress [34, 35]. However,  
74 there is substantial variation in both intra- and inter-specific bleaching thresholds [36],  
75 suggesting that levels of cooperation between host and symbiont may also vary. Significant  
76 work has gone into investigating coral bleaching over the past three decades, yet fundamental  
77 questions remain unresolved [37]. For example, five different hypotheses exist concerning  
78 the cellular mechanisms causing symbionts to be lost or ejected from host tissues and there is  
79 no consensus with respect to their relative importance during natural bleaching events [38]. A  
80 greater understanding of coral bleaching mechanisms is necessary for predicting and  
81 managing coral responses to climate change. Rather than asking what factors promote the  
82 breakdown of the coral-*Symbiodinium* relationship, here we investigate a factor predicted to  
83 reinforce it: the evolution of vertical symbiont transmission.

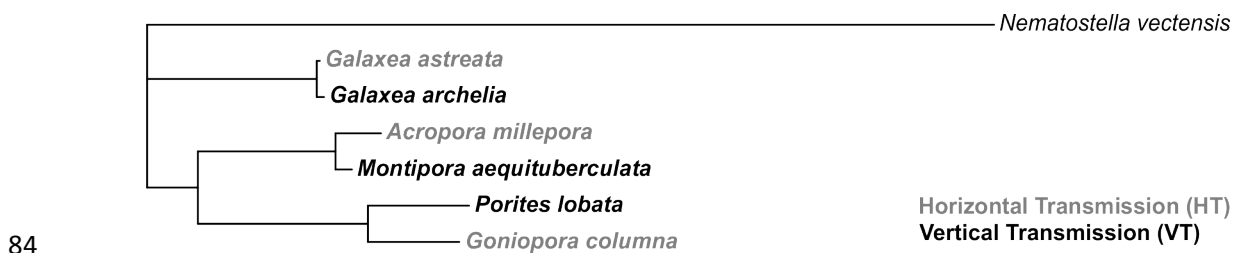

85 Figure 1. Cladogram of coral species used in this study (redrawn from 39,40) coloured by transmission mode.

86

87 We compare physiological components of fitness between horizontal and vertical  
88 transmitters in a phylogenetically controlled design of three pairs of related coral species  
89 exhibiting different strategies: (1) *Galaxea archelia* (vertical transmitter, VT) and *G. astreata*  
90 (horizontal transmitter, HT); (2) *Porites lobata* (VT) and *Goniopora columna* (HT); (3)  
91 *Montipora aequituberculata* (VT) and *Acropora millepora* (HT, Fig. 1). Species comparisons  
92 were drawn from the same or sister genera and replicate comparisons from more distantly  
93 related clades [39, 40]. Species also represented a diversity of reproductive modes (e.g.  
94 broadcast spawner, brooder), sexual systems (e.g. hermaphroditic, gonochoric), and  
95 morphologies (e.g. massive, branching), and host different subclades of *Symbiodinium* [41],

96 such that mode of symbiont transmission was the only consistent difference between pairs  
97 [31, 33, 42]. We quantified photosynthetic function and coral calcification (i.e. growth) under  
98 ambient conditions and changes in symbiont densities during thermal stress, to test the  
99 hypothesis that vertical transmission is associated with increased holobiont fitness. To  
100 examine patterns of cooperation we also quantified metabolic exchange between host and  
101 symbiont using radioisotopes. Finally, we conducted amplicon sequencing of the  
102 *Symbiodinium* ITS-2 locus to investigate whether symbiont community could explain patterns  
103 of fitness and cooperation among horizontal and vertical transmitters at a species level.

## 104 2. MATERIAL and METHODS

### 105 (a) *Coral Collection and Acclimation*

106 Fragments from sixty unique coral colonies (~genotypes), ~ 20 cm in diameter, were  
107 collected from reefs on the Central GBR from the 8-22 April 2015 under the Great Barrier  
108 Reef Marine Park Authority permit G12/35236.1 and G14/37318.1 (see Supplementary  
109 Material for additional details). Ten corals of each species, *Galaxea archelia* and *G. astreata*  
110 were collected from Davies Reef (18°49.816', 147°37.888'), ten corals each of *Acropora*  
111 *millepora* and *Montipora aequituberculata* were collected from Pelorus Island (18°33.358',  
112 146°30.276') and ten corals each of *Goniopora columna* and *Porites lobata* were collected  
113 from Pandora Reef (18°48.778', 146°25.593') from depths of <10m. Corals were transported  
114 to AIMS Sea Simulator facility and placed in shaded holding tanks with 0.2 µM filtered flow-  
115 through seawater (FSW, 27°C, 150 µM PAR). Each individual coral was further cut into 6  
116 genotype replicates using a diamond blade band saw and these fragments were mounted on  
117 aragonite plugs using either super-glue or marine epoxy. On 1 May 2015, fragments were  
118 moved into 12 50-L treatment tanks fitted with 3.5-watt Turbelle nanostream 6015 pumps  
119 (Tunze, Germany) with flow-through filtered seawater (FSW, ~25 liters/hour) at 27°C with a

120 12:12 light/dark cycle, peaking at 130-160  $\mu\text{M}$  PAR at midday. Tanks were cleaned daily.

121 Beginning on 7 May, at 20 mins before dark every day, corals were fed *Artemia* naupli at a

122 density of 1-1.5 naupli/5ml and rotifers at a density of 1-3/ml.

123 (b) *Experimental Conditions and Physiological Trait Measurements*

124 Beginning on 28 May 2015, effective quantum yield of *Symbiodinium* photosystem II

125 (EQY) was measured daily for all experimental fragments using a pulse amplitude modulated

126 fluorometer (diving-PAM, Waltz) fitted with a plastic fibre optic cable (Fig. S1).

127 Measurements were made using factory settings with a measuring intensity of 12 and a gain

128 of 5 and taken at peak light intensity. EQY values were used to set the final sampling time

129 point, where a decline reflects an impact on the photosynthetic condition of the *Symbiodinium*

130 [43], indicating onset of the coral bleaching response.

131 On 31 May 2015, temperatures in the heat treatment tanks were increased at a rate of

132 1°C per day until temperatures reached 31°C (day 4, Fig S2). Sample time points occurred on

133 day 2 (29°C, 1 Jun), day 4 (31°C, 3 Jun) and day 17 (31°C, 16 Jun, Fig S2). On each

134 sampling day, one replicate of each genotype (n=10) and species (n=6) from each

135 temperature treatment (n=2; n=120 total per sampling day) were used to measure net

136 photosynthesis and light-enhanced calcification following the protocol described in Strahl et

137 al. [44].

138 To quantify net photosynthesis and instant calcification, corals were incubated in

139 enclosed acrylic chambers at their respective treatment temperatures and light levels for 1.5

140 h. Four chambers without corals were used as blanks to account for potential changes in

141 oxygen content and alkalinity due to the metabolic activity of other microorganisms in the

142 seawater. For net photosynthesis measures, the O<sub>2</sub> concentration of the seawater in each

143 chamber was measured at the end of the run using a hand-held dissolved oxygen meter

144 (HQ30d, equipped with LDO101 IntelliCAL oxygen probe, Hach, USA). Values from blank  
145 chambers were subtracted from measures made in coral chambers and the subsequent rate of  
146 net photosynthesis was related to coral surface area, calculated in  $\mu\text{g O}_2/\text{cm}^2/\text{min}$ . To  
147 determine total alkalinity, a 120 ml subsample of seawater from each incubation chamber was  
148 fixed with 0.5 mg mercuric chloride. Light calcification rates were determined from changes  
149 in alkalinity quantified with the alkalinity anomaly technique [45] using a Titrand 855  
150 Robotic Titrosampler (Metrohm AG, Switzerland). Values from blank chambers were  
151 subtracted from measures made in coral chambers and calcification rate was related to coral  
152 surface area and calculated in  $\mu\text{M CaCO}_3/\text{cm}^2/\text{min}$ .

153 Tissue was removed from snap frozen coral skeletons using an air gun and  
154 homogenized for 60 s using a Pro250 homogenizer (Perth Scientific Equipment, AUS). A  
155 300- $\mu\text{l}$  aliquot of the tissue homogenate was fixed with 5% formalin in FSW and used to  
156 quantify *Symbiodinium* cell density. The average cell number was obtained from four  
157 replicate haemocytometer counts of a 1- $\text{mm}^3$  area and cell density was related to coral surface  
158 area and expressed as cells/ $\text{cm}^2$ . The remaining homogenate was centrifuged for 2 min at  
159 3500 rcf to separate host and symbiont fractions. For  $^{14}\text{C}$  bicarbonate treated corals, 2 ml of  
160 the host tissue slurry was frozen at  $-20^\circ\text{C}$ . For  $^{14}\text{C}$ -artemia/rotifer treated corals, the host  
161 slurry was discarded and the *Symbiodinium* cell pellet was washed with FSW, resuspended in  
162 2 ml FSW and frozen at  $-20^\circ\text{C}$ . Coral skeletons were rinsed with 5% bleach then dried at  
163 room temperature. Skeletal surface area was quantified using the single wax dipping method  
164 [46] and skeletal volume was determined by calculating water displacement in a graduated  
165 cylinder.

166 To measure resource sharing from algal symbionts to host animals, five genotypes of  
167 each species from each treatment (n=30 control, n=30 heat) were placed into 18-L of FSW  
168 with a 5-W aquarium pump for circulation and  $^{14}\text{C}$ -bicarbonate (specific activity: 56



169 mCi/mmol) was added to a final concentration of 0.28  $\mu$ Ci/ml. Corals were incubated for 5  
170 hours in light conditions identical to experimental tanks, rinsed with flow-through FSW for  
171 one hour to remove remaining unfixed  $^{14}$ C then snap frozen in liquid nitrogen. To measure  
172 resource sharing from host animal to algal symbionts, freshly hatched *Artemia* (~600  
173 naupli/ml) and rotifers (~600/ml) were incubated for 30 hours pre-feeding in FSW with 0.63  
174  $\mu$ Ci/ml  $^{14}$ C-glycine at 21°C in closed falcon tubes with gentle rotation (10 rpm), following  
175 the protocols of [47, 48]. This radioactive feed mix was washed for 5 min in FSW and added  
176 to treatment tanks containing the remaining five genotypes per species (n=30 control, n=30  
177 heat) in place of the normal afternoon feed (1-1.5 naupli/5ml and 1-1.5 rotifers/ml).  
178 Aquarium pumps were turned off for one hour and water flow was turned off for two hours to  
179 allow for food capture by corals. Corals were snap frozen in liquid nitrogen the following  
180 morning, 18 hrs post-feeding, following the protocol of [47].

181         Sample radioactivity was determined using a liquid scintillation counter (Tri-Carb  
182 2810TR v2.12, Perkin Elmer, USA). For host samples, triplicate 300  $\mu$ l aliquots were mixed  
183 with 3.5 ml Ultima Gold XR liquid scintillation cocktail (Perkin Elmer, USA). Samples were  
184 temperature and light adapted for 1 hour and then counted for 1.5 min using the default  
185 parameters. Counts per minute were converted to disintegrations per minute (DPM) using a  
186 standard curve derived from a  $^{14}$ C Ultima Gold Quench Standards Assay (Perkin Elmer,  
187 USA). For *Symbiodinium* samples, 500  $\mu$ l aliquots were mixed with 500  $\mu$ l 45% Sodium  
188 hypochlorite. Triplicate technical replicates were run for day 17 samples, duplicates for day 4  
189 samples and only a single replicate for day 2 samples. Samples were incubated for 2 hrs at  
190 60°C to bleach chlorophyll. Samples were then mixed with 3 ml Ultima Gold XR liquid  
191 scintillation cocktail; temperature and light adapted for 1 hour and counted using the same  
192 conditions as host samples. Technical replicates were averaged and counts were related to

193 total *Symbiodinium* cell number and coral surface area, calculated in  $^{14}\text{C}$  DPM/cell/cm<sup>2</sup> to  
194 control for variation in host size and symbiont cell density.

195 To identify major *Symbiodinium* clades hosted by focal species, DNA was extracted  
196 from symbiont fractions of the tissue homogenate for each genotype of each species (n=60)  
197 using Wayne's method [49]. A restriction digest of the LSU region of *Symbiodinium* rRNA  
198 [50, 51] across individuals consistently revealed single bands indicating the dominance of a  
199 single *Symbiodinium* clade for four of the six species (*A. millepora*, *M. aequituberculata*, *G.*  
200 *columna* and *P. lobata*) whereas communities in *G. astreata* and *G. archelia* appeared more  
201 variable (Fig. S3). Therefore, DNA was pooled in equal proportions by species (n=6 samples)  
202 to identify general species-specific communities and additional DNA samples for each of the  
203 *G. astreata* and *G. archelia* individuals (n=20 samples) were submitted for amplicon  
204 sequencing of the ITS2 region of *Symbiodinium* rRNA at the Genome Sequencing and  
205 Analysis Facility at the University of Texas at Austin.

### 206 (c) *Statistical Analyses*

207 All statistical analyses were performed in R, version 2.15.3 [52]. A series of linear  
208 mixed models were used to determine the effect of transmission mode on physiological  
209 components of fitness and cooperation. First, we determined the effect of transmission mode  
210 under ambient conditions. For corals from control tanks, we modelled the fixed effects of  
211 transmission mode (levels: vertical, horizontal), sampling day (levels: day 2, day 4, day 17)  
212 and their interaction on *Symbiodinium* cell density, net photosynthesis, light calcification and  
213 host-symbiont resource sharing using the *lme* command of the *nlme* package [53]. Symbiont  
214 densities and DPM values were log-transformed prior to statistical analyses to satisfy  
215 assumptions of linearity and homoscedasticity of model residuals. Patterns were evaluated  
216 within each focal species pair (*G. archelia* and *G. astreata*; *A. millepora* and *M.*

217 *aequituberculata*; *G. columna* and *P. lobata*), including a random effect of coral genotype  
218 within species.

219         Next, we explored changes in each of these traits for each of the focal species pairs at  
220 the end of a 17-day time-course of exposure to temperature stress. We modelled changes in  
221 *Symbiodinium* cell density, net photosynthesis, light calcification and host-symbiont resource  
222 sharing as a function of the fixed effects of transmission mode, temperature treatment, and  
223 their interaction, again including a random effect of genotype within species. Symbiont  
224 densities, and DPM values were log-transformed prior to statistical analyses.

225         All models were assessed for normality of residuals and homoscedasticity. To assess  
226 goodness-of-fit, we used the function *rsquared.glm* to calculate the conditional  $R^2$  value for  
227 each of our mixed models [54]. Significance of fixed factors within models was evaluated  
228 using Wald tests and Tukey's post-hoc tests were used to evaluate significance among levels  
229 within factors and interactions when warranted.

230         Amplicon sequencing data were analysed following methods described in [55]. A  
231 total of 858,110 paired-end reads were generated and the program *cd-hit* [56] was used to  
232 trim, quality filter and assemble raw reads into 100% identical groups, which resulted in 38  
233 operational taxonomic units (OTUs). This stringent cut-off was used in order to distinguish  
234 closely-related sub-groups within Clade C since C1 and C15, for example, are not resolved  
235 with lesser thresholds. For pooled species samples, 59% of reads were mapped to these 38  
236 OTUs, with total numbers ranging from 6213 to 20403 reads per sample pool (mean =  
237 14479). For individual *Galaxea* spp. samples, 62% of reads were mapped, with 277 to 57728  
238 reads per individual (mean = 23231). The *MCMC.OTU* package (ref) was used to analyse  
239 pooled samples and individual *Galaxea* spp. sample sets independently, discarding both  
240 outlier samples (those with total counts below z-score cutoff of -2.5) and OTUs (those

241 comprising less than 0.1% of the total sum of counts as per [57]). We then compared  
242 normalized proportions of remaining OTUs represented across remaining samples and used a  
243 blastn search against NCBI's *nr* database [58] to identify *Symbiodinium* types represented by  
244 dominant OTUs. To determine the impact of *Symbiodinium* communities on fitness responses  
245 within and among species pairs, OTU data were fit to a model incorporating a fixed effect of  
246 performance (categorized as 'high' or 'low' fitness within each pair, e.g. Fig. 2).

### 247 3. RESULTS

#### 248 (a) *The effect of transmission mode on physiological components of fitness*

##### 249 (i) *Acropora millepora* and *Montipora aequituberculata*

250 Net photosynthesis was elevated in the vertical transmitting (VT) coral *M.*  
251 *aequituberculata* compared to *A. millepora*, its horizontally transmitting (HT) relative  
252 ( $R^2_{\text{GLMM}}=0.51$ ,  $P<0.001$ , Fig 2A). *M. aequituberculata* also exhibited significantly elevated  
253 rates of calcification ( $R^2_{\text{GLMM}}=0.47$ ,  $P<0.0001$ , Fig 2B) and showed greater resilience to 17  
254 days of elevated temperature treatment, retaining higher *Symbiodinium* densities than *A.*  
255 *millepora* (Tukey's HSD $<0.05$ , Fig. 2C).

##### 256 (ii) *Goniopora columna* and *Porites lobata*

257 Trait patterns in *G. columna* and *P. lobata* were highly similar to the *M.*  
258 *aequituberculata* - *A. millepora* pair. *P. lobata* (VT) exhibited greater net photosynthesis than  
259 its HT counterpart, *G. columna* ( $R^2_{\text{GLMM}}=0.68$ ,  $P_{\text{Trans}}<0.0001$ , Fig 2D), though an interaction  
260 with sampling day was also observed, as the effect size was slightly less pronounced on the  
261 final day of sampling (0.11  $\mu\text{g}/\text{cm}^2/\text{min}$ , Tukey's HSD $<0.01$ ) when compared to the earlier  
262 days (day 1: 0.15  $\mu\text{g}/\text{cm}^2/\text{min}$ , Tukey's HSD $<0.001$ ; day 3: 0.21  $\mu\text{g}/\text{cm}^2/\text{min}$ , Tukey's  
263 HSD $<0.001$ , Fig S4). Coral host calcification also tended to be elevated in *P. lobata*, but the

264 difference was not significant and the effect varied among sampling days ( $R^2_{GLMM}=0.42$ ,  
 265  $P=0.06$ , Fig 2E, Fig. S5). Thermal tolerance, however, was significantly greater in *P. lobata*  
 266 when compared to *G. columna* (Tukey's HSD $<0.05$ , Fig. 2F).

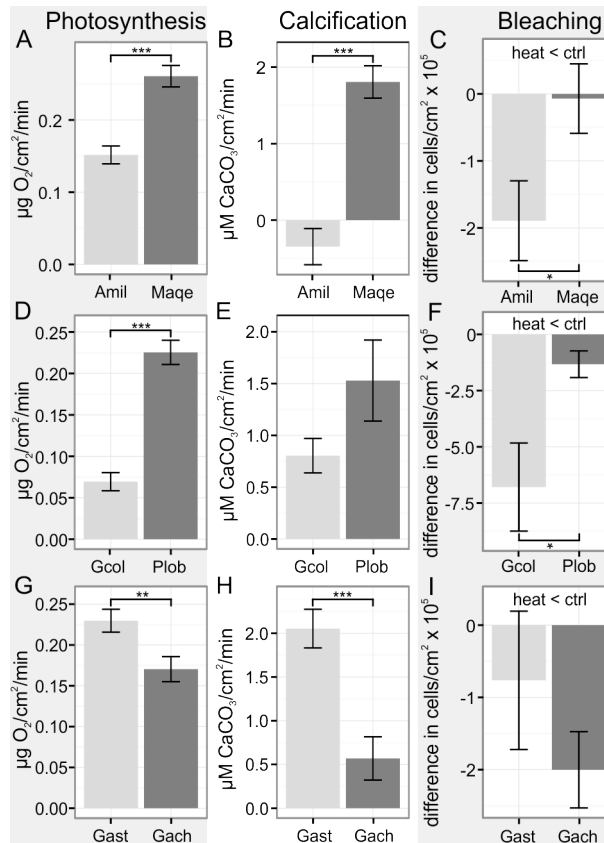

267

268 Figure 2. Effect of transmission mode on fitness-related traits across species pairs. (A,D,G) Mean net  
 269 photosynthesis ( $\pm$ SEM,  $n=30$  per species), (B,E,H) mean calcification ( $\pm$ SEM,  $n=15$  per species) under ambient  
 270 conditions ( $27^{\circ}\text{C}$ ) and (C,F,I) mean bleaching ( $\pm$ SEM,  $n=30$  per species), quantified as the loss of *Symbiodinium*  
 271 in heat-treated corals ( $31^{\circ}\text{C}$ ) relative to their paired controls in (A-C) *Acropora millepora* and *Montipora*  
 272 *aequituberculata*, (D-F) *Goniopora columna* and *Porites lobata*, and (G-H) *Galaxea astreata* and *G. archelia*.  
 273 In bleaching panels, 'heat < ctrl' indicates a significant effect of temperature treatment ( $P<0.05$ ), independent of  
 274 transmission mode. Stars indicate significant difference between species pairs ( $*<0.05$ ,  $**<0.01$ ,  $***<0.001$ ).

275

276 (iii) *Galaxea astreata* and *Galaxea archelia*

277 Contrary to predictions, the HT congener, *G. astreata*, exhibited greater net  
 278 photosynthesis ( $R^2_{GLMM}=0.21$ ,  $P<0.01$ , Fig 2G) and calcification ( $R^2_{GLMM}=0.30$ ,  $P<0.001$ , Fig  
 279 2H) than *G. archelia* (VT). Thermal tolerance was not significantly different between these  
 280 species (Fig. 2I).

281 (b) *The effect of transmission mode on host-symbiont cooperation*

282 (i) *Acropora millepora* and *Montipora aequituberculata*

283 *Symbiodinium* densities did not differ between these species ( $R^2_{GLMM}=0.51$ , Fig 3A).

284 *A. millepora* (HT) received more photosynthetically fixed carbon from its symbionts than *M.*

285 *aequituberculata* (VT,  $R^2_{GLMM}=0.51$ ,  $P<0.01$ , Fig 3B) and hosts exhibited a non-significant

286 trend of sharing more heterotrophically acquired carbon with each of their symbionts

287 ( $R^2_{GLMM}=0.29$ ,  $P=0.17$ , Fig 3C).

288

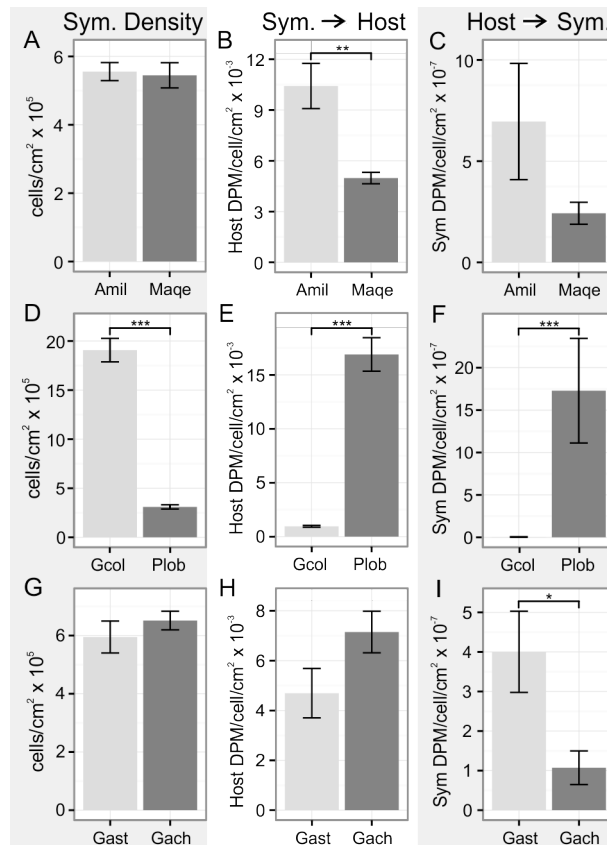

289 Figure 3. Effect of transmission mode on cooperation across species pairs in ambient conditions (27°C).  
 290 (A,D,G) Mean *Symbiodinium* cell density ( $\pm$ SEM,  $n=30$  per species), (B,E,H) mean carbon transfer from  
 291 symbiont to host ( $\pm$ SEM,  $n=15$  per species) and (C,F,I) mean carbon transfer from host to symbiont ( $\pm$ SEM,  
 292  $n=15$  per species) in (A-C) *Acropora millepora* and *Montipora aequituberculata*, (D-F) *Goniopora columna*  
 293 and *Porites lobata*, and (G-H) *Galaxea astreata* and *G. archelia*. Stars indicate significant difference between  
 294 species pairs (\* $<0.05$ , \*\* $<0.01$ , \*\*\* $<0.001$ ).

295

296

297 (ii) *Goniopora columna* and *Porites lobata*

298 *P. lobata* (VT) exhibited reduced *Symbiodinium* densities in comparison to *G.*  
299 *columna* (HT,  $R^2_{\text{GLMM}}=0.89$ ,  $P<0.0001$ , Fig 3D). However, each *P. lobata* symbiont  
300 transferred more photosynthetically fixed carbon to its host ( $R^2_{\text{GLMM}}=0.94$ ,  $P<0.0001$ , Fig 3E)  
301 and hosts shared more heterotrophically acquired carbon with each of their symbionts  
302 ( $R^2_{\text{GLMM}}=0.97$ ,  $P<0.0001$ , Fig. 3F) than *G. columna*, although the absolute amount shared  
303 varied among sampling days ( $P=0.02$ , Fig. S6).

304 (iii) *Galaxea astreata* and *Galaxea archelia*

305 *Symbiodinium* densities did not differ between *G. archelia* (VT) and *G. astreata* (HT,  
306  $R^2_{\text{GLMM}}=0.46$ , Fig 3G). *G. archelia* symbionts tended to share more carbon with their hosts,  
307 but this trend was not significant ( $R^2_{\text{GLMM}}=0.49$ ,  $P=0.1$ , Fig 3H) whereas *G. astreata*  
308 exhibited greater host to symbiont carbon transfer, although this pattern varied among  
309 sampling days ( $R^2_{\text{GLMM}}=0.66$ ,  $P<0.05$ , Fig 3I, Fig. S6).

310 (c) Does *Symbiodinium* community composition explain fitness differences?

311 For species pools, 24 operational taxonomic units (OTUs) of sufficient representation  
312 ( $>0.1\%$  abundance, *sensu* [57]) were identified and consisted of clade C1 and D1-type  
313 *Symbiodinium* (Table S1). *Symbiodinium* communities varied among species (Fig. 4A) and a  
314 model comparing high performing (*M. aequituberculata*, *P. lobata*, *G. astreata*) and low  
315 performing species (*A. millepora*, *G. columna*, *G. archelia*, Fig. 2) found no relationship  
316 between observed fitness differences and changes in abundance of these OTUs.

317 In *A. millepora*, 86% of reads were accounted for by three major OTUs all matching  
318 to clade C-type *Symbiodinium*, identified as variants of C1 (Fig. 4A). *M. aequituberculata*  
319 reads nearly all mapped to one of these same variants (C\_BH34, 95%, Fig. 4A). Reads were

320 similarly uniform in *G. columna*, with 94% mapping to the most common C1-type OTU  
 321 across samples (Fig. 4A). In *P. lobata*, read diversity was more variable. 36% of reads  
 322 mapped to a C15-type OTU (Fig. 4A), a common associate of *Porites* spp. in the Indo-Pacific  
 323 [59]. An additional 47% of *P. lobata* reads also mapped to two other C1-type symbiont  
 324 OTUs, while 10% were identified as the most abundant clade D-type OTU, D1 (Fig. 4A).  
 325 Reads from both *Galaxea* spp. predominantly mapped to the major C1-type OTU identified  
 326 across species (63% of *G. astreata* reads and 43% of *G. archelia* reads, Fig. 4A) but these  
 327 species also contained major fractions of an OTU identified as a D1-type *Symbiodinium* (*G.*  
 328 *astreata*: 20%, *G. archelia*: 33%, Fig. 4).

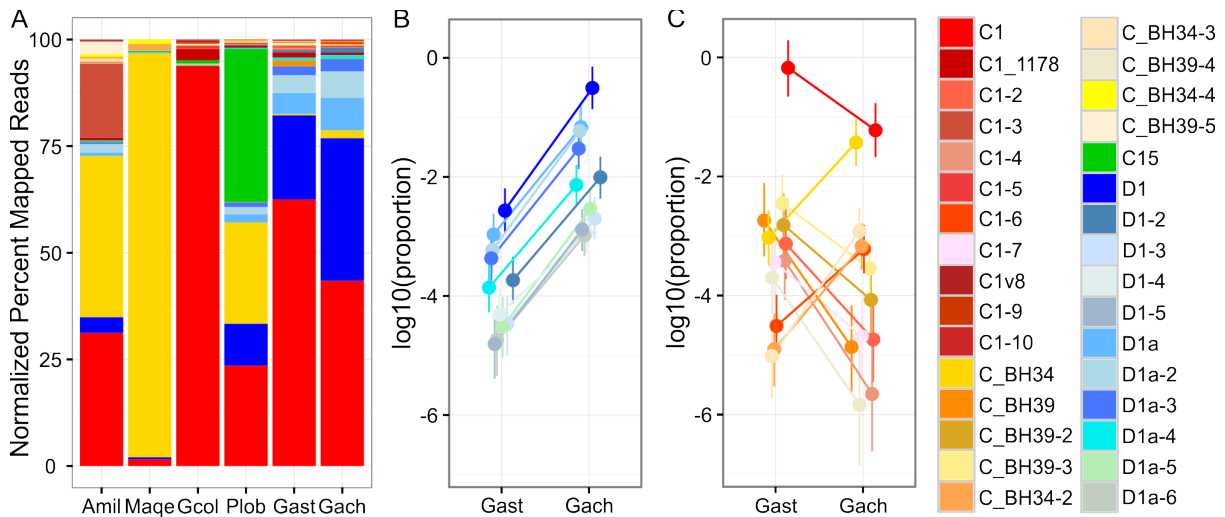

329 Figure 4. *Symbiodinium* community composition. (A) Normalized proportion of reads mapping to each  
 330 *Symbiodinium* OTU (>0.1% abundance) from pooled samples of all individuals within each focal species. Log<sub>10</sub>  
 331 proportion of (B) D-type and (C) C-type OTUs showing significant differences in abundance between individual  
 332 samples of *G. astreata* and *G. achrelia* by species (FDR<0.05).  
 333

334

335 Significant differences in OTU abundance were detected between *G. astreata* and *G.*  
 336 *archelia* when individual coral samples were analysed (Fig. 4B,C). For this sample set, 27  
 337 OTUs passed the abundance threshold, consisting of the same major OTUs identified in the  
 338 species pools and a few additional low abundance variants (<1%, Table S1). Of these, 23  
 339 showed significant differences in abundance between the two species (FDR<0.05). All of the



340 significant D-type OTUs showed increased abundance in *G. archelia* relative to *G. astreata*  
341 (11/11, Fig. 4B) whereas the majority of C-type OTUs showed decreases (8/12, Fig. 4C). The  
342 most notable exception to the increased D/decreased C pattern was the second most abundant  
343 C-type OTU across samples, C\_BH34, which was elevated in *G. archelia* (Fig. 4C, Table  
344 S1).

#### 345 4. DISCUSSION

346 Understanding variation in the degree of cooperation between corals and their  
347 *Symbiodinium* will be critical for assessing survival potential among species and populations  
348 in the face of increasing environmental change [12]. As in other mutualisms [19-21], vertical  
349 transmission has been proposed as an evolutionary mechanism for enhancing holobiont  
350 fitness in the Cnidarian-algal symbiosis [60]. This study is the first to empirically test these  
351 predictions by quantifying photosynthesis, calcification, thermal tolerance and carbon sharing  
352 using a phylogenetically controlled design that pits vertically transmitting corals against their  
353 closest horizontally transmitting relatives (Fig. 1).

354 On average, trait patterns support theoretical predictions for the evolution of vertical  
355 transmission (Fig. S7), but individual species pairs differ in their degree of conformity. Both  
356 *P. lobata* and *M. aequituberculata* (VT) exhibited elevated net photosynthesis, calcification  
357 and thermal tolerance, or greater holobiont fitness, than their HT counterparts (Fig. 2A-F),  
358 consistent with predictions. However, the VT *G. archelia* provides no support as it was  
359 consistently out-performed by its HT relative, *G. astreata* (Fig. 2G-I). Possible explanations  
360 for these results include variation in *Symbiodinium* community or in life-history traits among  
361 species.

362 *Symbiodinium* community composition does not explain differential fitness and cooperation  
363 among taxa

364 Previous work has shown that variation in *Symbiodinium* community composition can  
365 impact holobiont fitness and cooperation. For example, conspecific corals hosting clade D  
366 *Symbiodinium* exhibit greater thermal tolerance than those hosting C1 or C2-types [61, 62],  
367 however they generally grow more slowly under non-stressful conditions [63, 64] and receive  
368 less photosynthetically fixed carbon from their symbionts [65]. We investigated  
369 *Symbiodinium* community composition in our six focal species (Fig. 4) but did not detect any  
370 consistent differences that could explain differential performance in high vs. low fitness  
371 species (Fig. 2). The low-performing *A. millepora* and *G. archelia* did host more D-type  
372 *Symbiodinium* than their paired counterparts, but so did *P. lobata*, the only species to exhibit  
373 both elevated fitness and cooperation (Fig. 2,3,4). The overall diversity of symbionts hosted  
374 was also unrelated to fitness, as both the high performing *M. aequituberculata* and low  
375 performing *G. columna* hosted highly homogenous communities, with a single OTU  
376 comprising 94-95% of reads in each (Fig. 4A). Taken together, these results support prior  
377 observations that *Symbiodinium* community composition alone is not sufficient to explain  
378 variation in coral fitness and that interactions with the host must also be considered [66-68].

379 *Does reproductive mode influence the mode of symbiont transmission in corals?*

380 Among the selected vertically transmitted species used in this study, *Porites lobata*  
381 and *Montipora aequituberculata* exhibit a different reproductive life-history strategy than  
382 *Galaxea archelia*, which may provide an alternate explanation for the lack of conformity in  
383 the *Galaxea* spp. pairing relative to the other two. Two reproductive modes predominate in  
384 reef-building corals: broadcast spawning and internal brooding. Broadcast spawning, the  
385 majority strategy, is characterized by an annual release of gametes that undergo fertilization  
386 at the ocean surface to produce planktonic larvae [33]. Brooders release only sperm,  
387 fertilization is internal and larvae develop within parental tissue [69]. *P. lobata* and *M.*  
388 *aequituberculata* are broadcast spawning corals that transmit *Symbiodinium* in oocytes. *G.*

389 *columna*, *A. millepora* and *G. astreata* are also broadcast spawning corals, but do not exhibit  
390 vertical transmission of *Symbiodinium*. Whereas *G. archelia* is a brooding coral that releases  
391 planulae larvae infected with the maternal symbiont type.

392 Predictions regarding the cooperative and fitness benefits of evolving vertical  
393 transmission are based on the assumption that the host-symbiont relationship becomes  
394 exclusive: symbiont populations are substantially reduced, resulting in genetic uniformity,  
395 more rapid co-evolution of partner traits and reduction in intra-symbiont community  
396 competition [4, 20]. Different mechanisms of symbiont infection are likely utilized in  
397 brooders and broadcasters that could impact the strictness of vertical transmission. In  
398 *Montipora* corals, *Symbiodinium* have been observed entering the oocytes between 8 and 32  
399 hours prior to spawning [70] suggesting a specific mechanism with a defined window of  
400 infectivity in broadcasting vertical transmitters. In horizontally transmitting corals,  
401 phagocytosis is considered the predominant mode of symbiont uptake whereby larvae or  
402 juvenile coral polyps consume *Symbiodinium* via active feeding [71] though developmentally  
403 earlier acquisitions have also been observed [72]. The time-window for uptake and  
404 establishment of symbiosis in these HT broadcast-spawned juveniles spans days to weeks and  
405 the initial symbiotic relationships they establish can be highly promiscuous, suggesting that  
406 the early establishment process may be passive on the part of the host [73, 74]. It is possible  
407 that vertical transmission in brooding corals, such as *G. archelia*, occurs by a similar passive  
408 larval uptake mechanism, save that the first infection occurs in the maternal environment.  
409 Two recent studies suggest that acquisition of additional *Symbiodinium* types can occur after  
410 the initial maternal infection [75, 76], supporting this conjecture. A meta-analysis by Fabina  
411 *et al.* [77] also observed more diverse symbiotic interactions in brooding vertical transmitters  
412 than in broadcasting vertical transmitters, further suggesting that the strictness of vertical  
413 transmission may be dependent on the mode of infection across life-histories.

414 Competition among maternally-derived and environmentally-acquired *Symbiodinium*  
415 would negate the fitness benefits associated with strict vertical transmission in brooding  
416 corals, providing a possible explanation for the observed difference between *G. archelia* and  
417 the two transovarial transmitters, *A. millepora* and *P. lobata*. However, as only one brooding  
418 coral was used in the present study, it is difficult to draw any firm conclusions. Additional  
419 comparative data on fitness in brooding corals and the mechanism of uptake and  
420 establishment of symbiosis in general [78] are needed to test this hypothesis.

#### 421 *The disconnect between cooperation and fitness*

422 The role of cooperation, defined here as resource sharing between hosts and  
423 symbionts, in determining fitness outcomes of horizontal and vertical transmitters also  
424 requires additional study as patterns of host-symbiont cooperation did not necessarily match  
425 fitness patterns across species pairs. Cooperation and fitness were aligned in *P. lobata*:  
426 *Symbiodinium* densities were naturally lower (Fig. 3D), suggesting reduced symbiont  
427 virulence (*sensu* [23]), while carbon sharing between partners was greater (Fig. 3E,F),  
428 suggesting enhanced cooperation. However, resource sharing in the other high-fitness vertical  
429 transmitter, *M. aequituberculata*, was characterized by reduced symbiont to host carbon  
430 transfer (Fig. 3B) and a tendency towards reduced host to symbiont transfer (Fig. 3C), though  
431 *Symbiodinium* densities were not significantly different between species in this focal pair  
432 (Fig. 3A). For *Galaxea* spp., *Symbiodinium* densities were also similar between species, but  
433 symbiont to host carbon transfer tended to be greater in *G. archelia*, while host to symbiont  
434 transfer was greater in *G. astreata* (Fig. 3G-I).

435 Quantifying cooperation between symbiotic partners in terms of biologically realistic  
436 costs and benefits remains an outstanding question for many symbioses [20]. The transfer of  
437 photosynthetically fixed carbon has long been known as a major cooperative benefit to the

438 coral host as up to 95% of a coral's energy requirements can be met through this mechanism  
439 [79]; however, reciprocal products shared by hosts with their symbionts remain largely  
440 unknown [80]. We chose to enrich our heterotrophic treatment (*Artemia*+Rotifers) with <sup>14</sup>C-  
441 glycine because it is one of the few products known to be translocated from invertebrate hosts  
442 to *Symbiodinium* [81, 82], but this metabolite may not be the most critical for *Symbiodinium*  
443 fitness. The recently sequenced *Symbiodinium kawagutii* genome lacks biosynthesis  
444 pathways for lysine and histidine [83], which may be better candidate host-derived amino  
445 acids to investigate. Similarly, heterotrophic feeding can offset the need for symbiont-derived  
446 carbon in some species and in these cases other symbiont-derived metabolites may be more  
447 critical for host fitness. *Montipora capitata* showed a greater capacity for heterotrophic  
448 supplementing of metabolism than two *Porites* spp. during lab-induced bleaching [84],  
449 providing a possible explanation for the differences in symbiont to host carbon sharing  
450 observed between *Montipora* and *Porites* in the present study. Ultimately, a greater  
451 understanding of the metabolic interactions between coral hosts and symbionts is needed in  
452 order to test their roles in fluctuating cost/benefit scenarios.

## 453 5. CONCLUSIONS

454 The major transitions approach, defined by Maynard Smith and Szathmáry [4], has  
455 recently been proposed as a unifying conceptual framework for investigating how fully  
456 integrated symbioses evolve from simple partnerships [3, 9]. We suggest that reef-building  
457 corals meet the criteria for a major transition between species: the partnership is obligate,  
458 vertical transmission has evolved repeatedly, and in some cases, this evolution has aligned  
459 partner interests, resulting in increased holobiont fitness. Reef-building corals have the  
460 potential to fill an empirical gap in the study of major transitions between species and new  
461 investigations into the coral-algal symbiosis using this broader evolutionary framework will  
462 increase understanding of one of the most ecologically important and critically endangered

463 symbioses on the planet. For example, changes in transmission mode are not the only means  
464 of increasing cooperation between species [18]. Partner sanctions, in which hosts selectively  
465 weed out underperforming symbionts or reward the most productive individuals, are known  
466 to be important in other endo-symbioses [85, 86]. Corals are known to regularly expel viable  
467 symbionts (reviewed in [78]); however, this expulsion has yet to be examined in the context  
468 of cooperation. It is possible that this process is not random, but rather targets removal of  
469 underperforming symbionts. An improved molecular tool-kit is needed in order to  
470 manipulate *Symbiodinium* performance and track subsequent expulsion to test this  
471 hypothesis. Emerging model systems, such as *Aiptasia* [87], will likely facilitate future work  
472 in this area.

#### 473 DATA ARCHIVING

474 All scripts and input files will be available on DRYAD upon manuscript acceptance.

#### 475 COMPETING INTERESTS

476 We have no competing interests.

#### 477 AUTHOR CONTRIBUTIONS

478 CDK designed research; CDK and LKB performed research; CDK analysed data; CDK wrote  
479 the first draft of the manuscript and both authors contributed to revisions and gave final  
480 approval for publication.

#### 481 ACKNOWLEDGEMENTS

482 The authors gratefully acknowledge the efforts of A Bouriat in maintaining aquaria and  
483 processing coral samples. M Salmon, G Milton, A Severati, C Humphrey implemented the  
484 experimental aquaria design. Coral collection was accomplished with the help of S Noonan,

485 V Mocellin, A Severati and M Nayfa. P Muir provided advice on coral taxonomic  
486 identification. Comments from J Caley, B Schaffelke and 2 anonymous reviewers greatly  
487 improved this manuscript.

#### 488 FUNDING

489 An NSF International Postdoctoral Research Fellowship, DBI-1401165, to CDK and funding  
490 from the Australian Institute of Marine Science to LKB, supported this work.

491

492

493

494

495

496

497

498

499

500

501

502

503

504 Table S1. Best BLASTn matches to the NCBI *nr* database [58] for the most abundant  
 505 operational taxonomic units (OTUs) detected across samples (>0.1% abundance). Value in %  
 506 column indicates mean percent abundance across all samples in which OTU was identified.  
 507 Origin column indicates which sample set OTU was identified in, species pools (P) or  
 508 individual *Galaxea* spp. (I).

| OTU (name)       | %   | Origin | Description          | E-value | Accession  |
|------------------|-----|--------|----------------------|---------|------------|
| OTU1 (C1)        | 49  | P, I   | Symbiodinium sp. C1  | 0.0     | JN558041.1 |
| OTU2 (D1)        | 31  | P, I   | Symbiodinium sp. D1  | 3e-174  | JN558075.1 |
| OTU3 (C BH34)    | 13  | P, I   | Symbiodinium sp. C   | 4e-168  | JN711493.1 |
| OTU4 (D1a)       | 7   | P, I   | Symbiodinium sp. D1a | 2e-170  | JN558080.1 |
| OTU5 (D1a-2)     | 6   | P, I   | Symbiodinium sp. D1a | 2e-170  | JN558080.1 |
| OTU6 (D1a-3)     | 3   | P, I   | Symbiodinium sp. D1a | 2e-168  | JN558080.1 |
| OTU7 (C BH39)    | 1   | P, I   | Symbiodinium sp. C   | 5e-172  | JN711498.1 |
| OTU8 (C15)       | 2   | P, I   | Symbiodinium sp. C15 | 1e-173  | JN558044.1 |
| OTU9 (D1a-4)     | 0.7 | P, I   | Symbiodinium sp. D1a | 1e-168  | JN558080.1 |
| OTU10 (C1_1178)  | 0.7 | P, I   | Symbiodinium sp. C1  | 4e-168  | EU074889.1 |
| OTU11 (D1-2)     | 1   | P, I   | Symbiodinium sp. D1  | 2e-155  | AB778759.1 |
| OTU12 (C1-2)     | 0.4 | P, I   | Symbiodinium sp.     | 4e-167  | EU786053.1 |
| OTU13 (C1-3)     | 0.4 | P      | Symbiodinium sp.     | 4e-167  | EU118163.1 |
| OTU14 (C1-4)     | 0.2 | P, I   | Symbiodinium sp.     | 4e-167  | EU786015.1 |
| OTU15 (C1-5)     | 0.2 | P, I   | Symbiodinium sp.     | 3e-164  | KP134434.1 |
| OTU16 (C BH39-2) | 0.2 | P, I   | Symbiodinium sp. C   | 2e-165  | JN711498.1 |
| OTU17 (C BH39-3) | 0.5 | P, I   | Symbiodinium sp. C   | 2e-165  | JN711498.1 |
| OTU18 (D1-3)     | 0.2 | I      | Symbiodinium sp. D1  | 1e-163  | JN558075.1 |
| OTU19 (C1-6)     | 0.2 | P, I   | Symbiodinium sp. C1  | 1e-163  | JN558041.1 |
| OTU20 (C BH34-2) | 0.2 | P, I   | Symbiodinium sp. C   | 4e-158  | JN711493.1 |
| OTU21 (D1a-5)    | 0.3 | I      | Symbiodinium sp. D1a | 5e-162  | JN558080.1 |
| OTU22 (C BH34-3) | 0.3 | I      | Symbiodinium sp. C   | 8e-160  | JN711493.1 |
| OTU23 (C1-7)     | 0.1 | I      | Symbiodinium sp.     | 1e-163  | KP134433.1 |
| OTU24 (D1-4)     | 0.1 | I      | Symbiodinium sp. D1  | 3e-159  | JN558075.1 |
| OTU25 (C BH34-4) | 0.3 | P      | Symbiodinium sp. C   | 2e-146  | JN711493.1 |
| OTU26 (C BH39-4) | 0.1 | I      | Symbiodinium sp. C   | 2e-165  | JN711498.1 |
| OTU27 (D1a-6)    | 0.1 | I      | Symbiodinium sp. D1a | 3e-159  | JN558080.1 |
| OTU28 (C1_1142)  | 0.1 | I      | Symbiodinium sp. C1  | 2e-165  | EU074884.1 |
| OTU30 (C BH39-5) | 0.7 | P      | Symbiodinium sp. C   | 1e-163  | JN711498.1 |
| OTU31 (C1-9)     | 0.1 | P      | Symbiodinium sp. C1  | 1e-163  | JN558041.1 |
| OTU34 (C1v8)     | 0.1 | P      | Symbiodinium sp. C1  | 1e-147  | HG942434.1 |
| OTU35 (C1-10)    | 0.1 | P      | Symbiodinium sp. C1  | 3e-154  | JN558041.1 |
| OTU38 (D1-5)     | 0.1 | I      | Symbiodinium sp. D1  | 1e-163  | JN558075.1 |

509

510

511

512

513

514



515 Figure S1. Daily measures of effective quantum yield (EQY $\pm$ SEM, note that range of error  
516 bars is extremely small, in most cases barely exceeding points) of *Symbiodinium* photosystem  
517 II by temperature treatment. Bars show the difference in mean EQY between treatments  
518 through time (n=720 per bar).

519

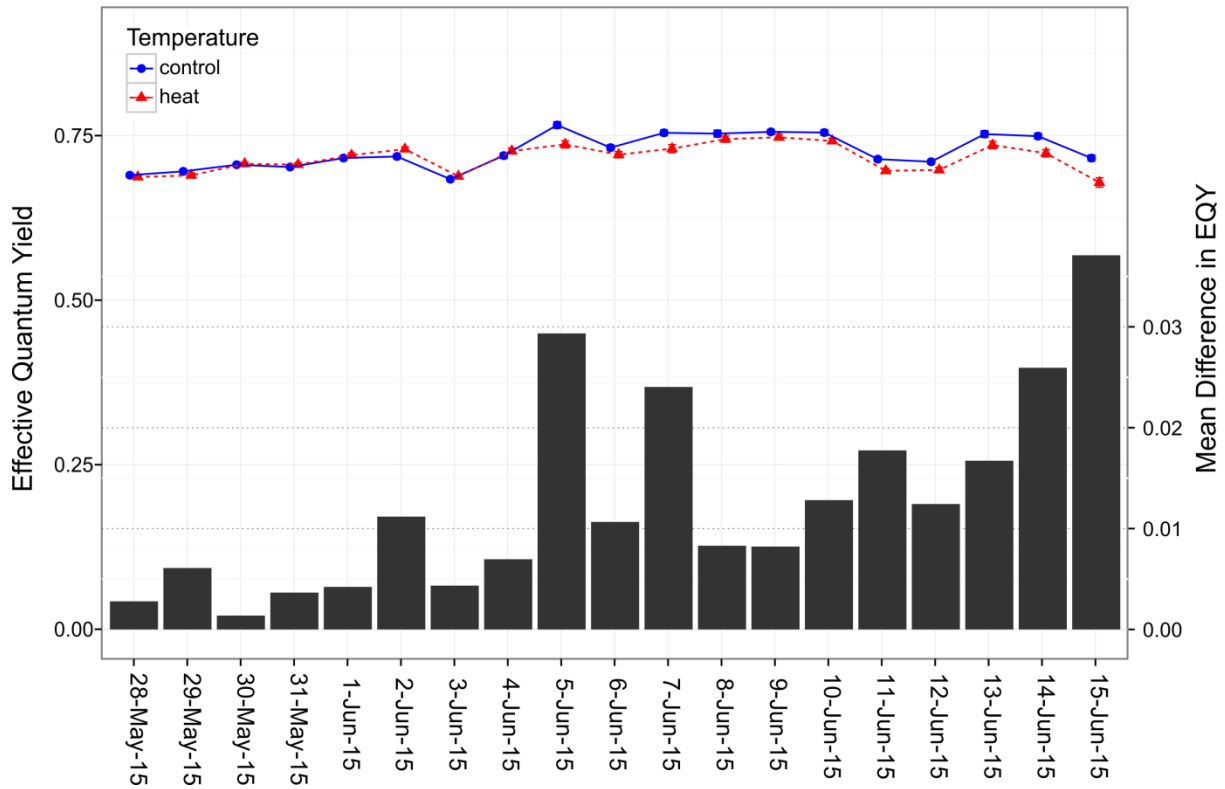

520

521

522 Figure S2. Temperature profile of experimental treatment tanks ( $\pm$ SD) by date. Bars indicate  
523 time of sampling.

524

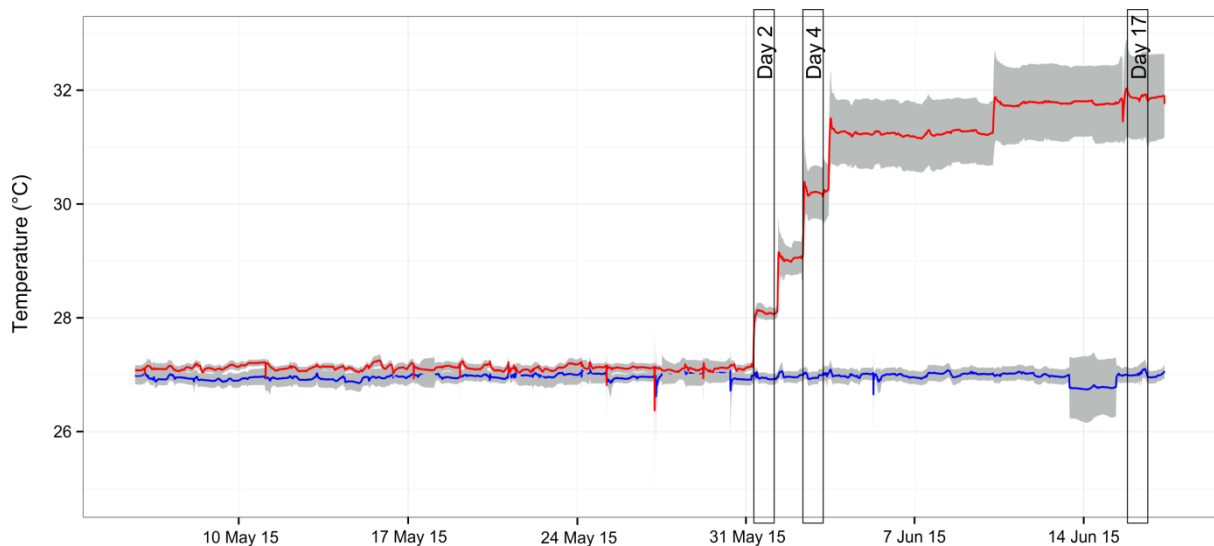

525

526 Figure S3. Taq1 digest of *Symbiodinium* LSU rRNA. Samples are grouped by species pairs.  
527 Standard shows expected banding pattern for *Symbiodinium* genotypes in clades C and D.

528

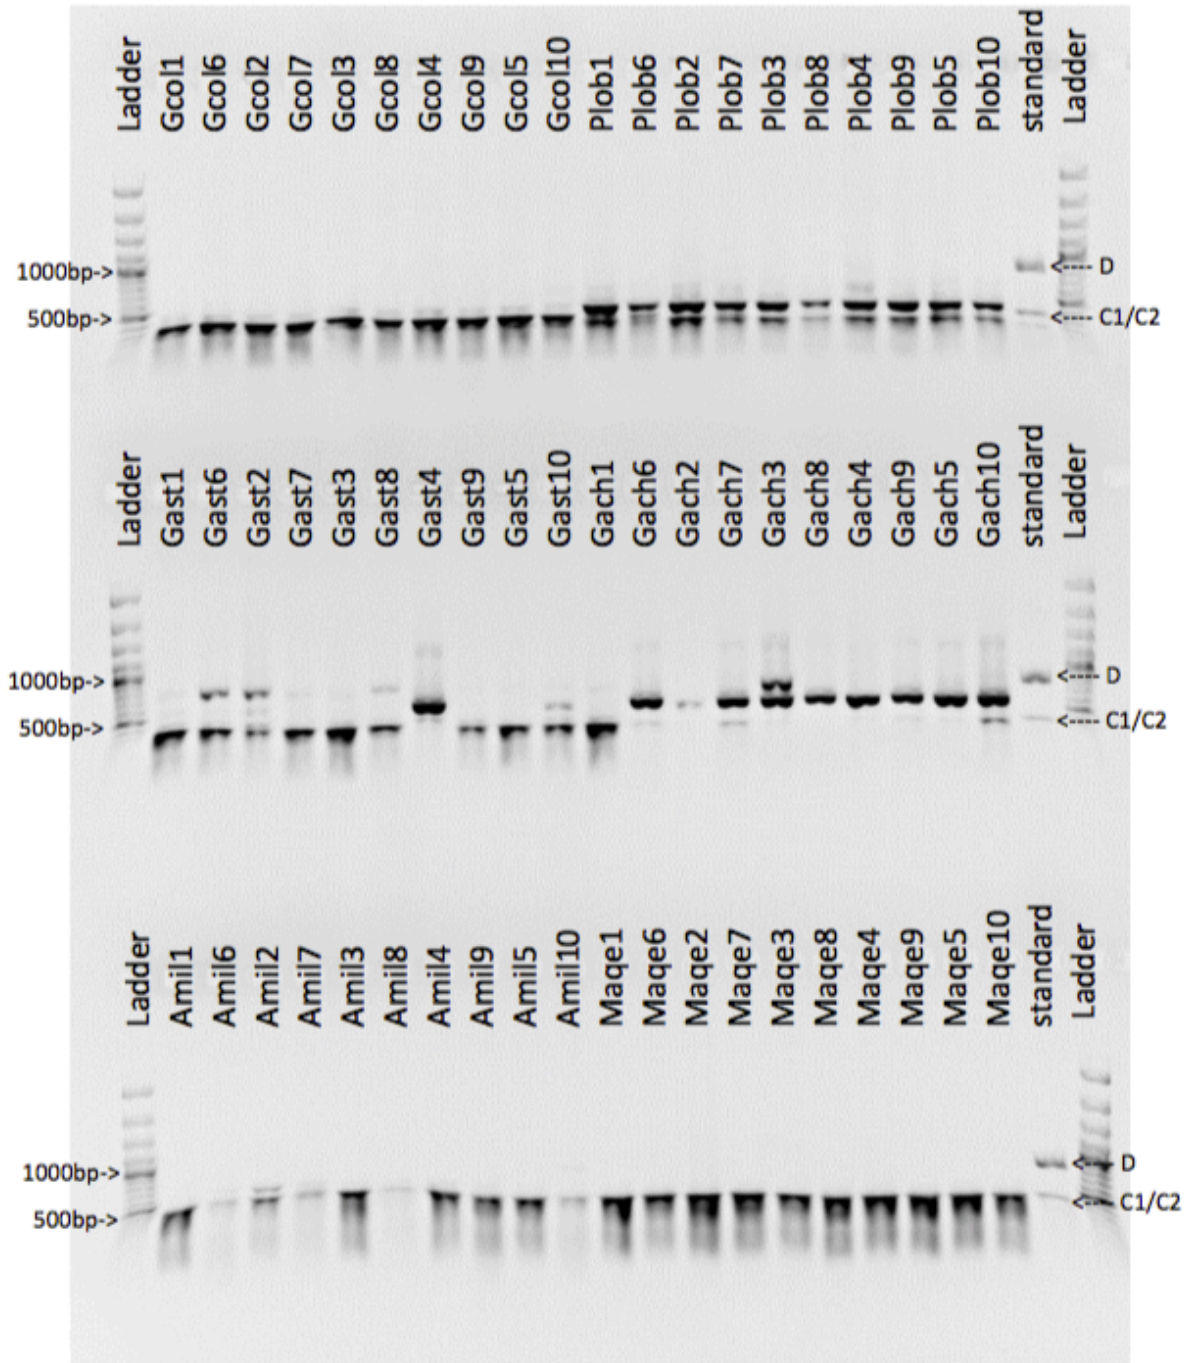

529

530

531

532

533

534 Figure S4. Mean net photosynthesis ( $\pm$ SEM, n=10 per bar) in ambient conditions (27°C) by  
535 sampling day and species.

536

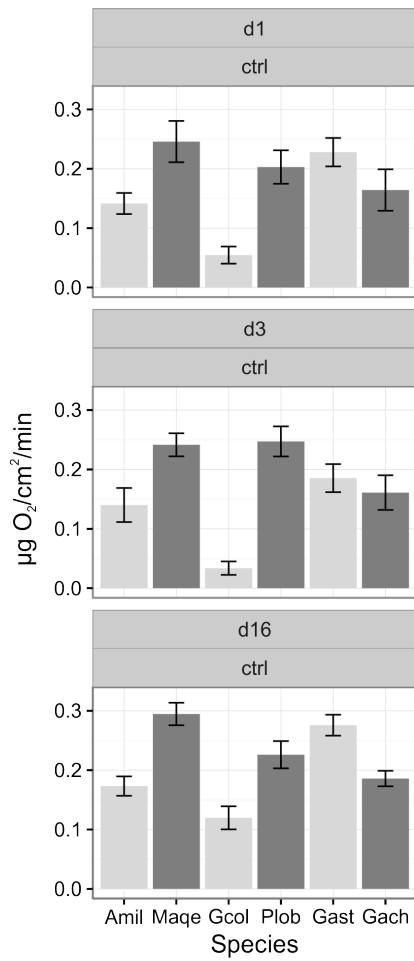

537

538

539

540

541

542

543

544

545

546

547

548

549 Figure S5. Mean calcification ( $\pm$ SEM,  $n=10$  per bar) in ambient conditions ( $27^{\circ}\text{C}$ ) by  
550 sampling day and species.

551

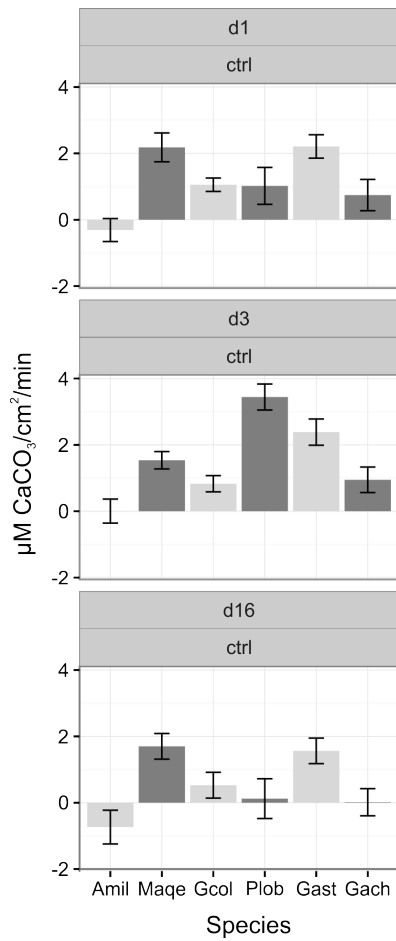

552

553

554

555

556

557

558

559

560

561

562

563

564 Figure S6. Mean carbon transfer from host to symbiont ( $\pm$ SEM, n=5 per bar) in ambient  
565 conditions (27°C) by sampling day and species.

566

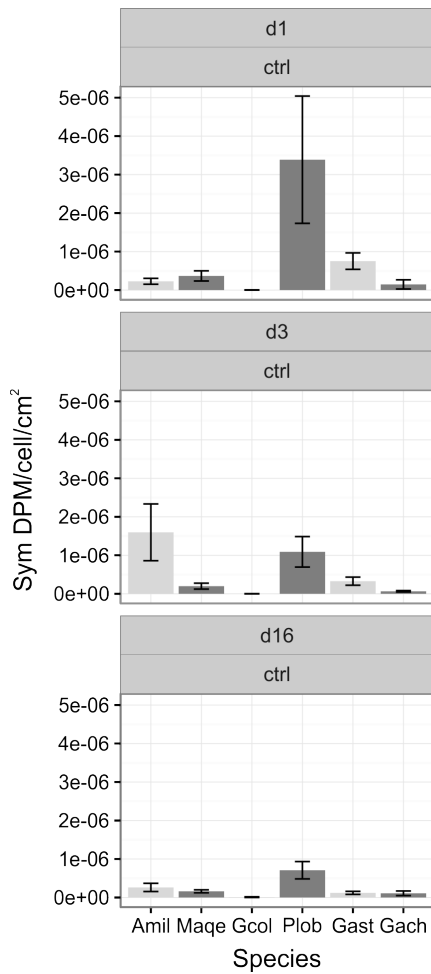

567

568

569 Figure S7. Average effect of transmission mode in ambient conditions (27°C) on mean  
570 *Symbiodinium* cell density ( $\pm$ SEM, n=90 per mode), mean net photosynthesis ( $\pm$ SEM, n=90  
571 per mode), mean carbon transfer from symbiont to host ( $\pm$ SEM, n=45 per mode), mean  
572 carbon transfer from host to symbiont ( $\pm$ SEM, n=45 per mode) and mean calcification  
573 ( $\pm$ SEM, n=45 per mode).

574

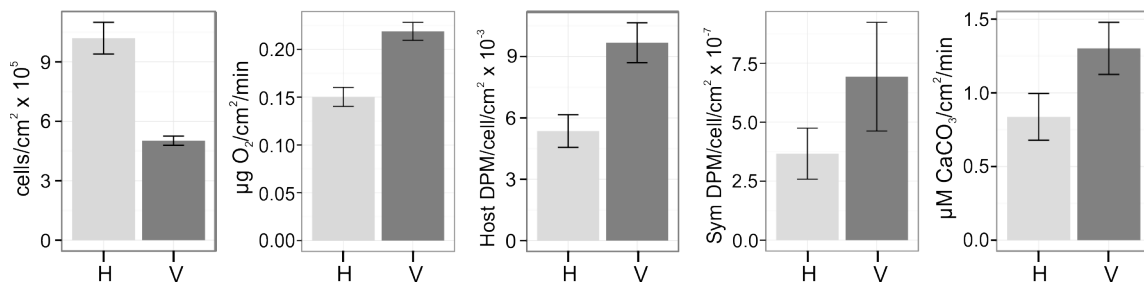

575

576 REFERENCES

- 577 1. Moran N.A. 2006 Symbiosis. *Current Biology* **16**, R866-R871.
- 578 2. Friesen M.L., Jones E.I. 2013 Modelling the evolution of mutualistic symbioses. In *Bacterial*  
579 *Molecular Networks: Methods and Protocols* (eds. van Helden J., Toussaint A., Thieffry D.), pp. 481-  
580 499, Springer Science+Business Media.
- 581 3. Kiers T.E., West S.A. 2015 Evolving new organisms via symbiosis. *Science* **348**(6233), 392-394.
- 582 4. Maynard Smith J., Szathmary E. 1995 *The Major Transitions in Evolution*. Oxford, Freeman.
- 583 5. Bshary R. 2001 The cleaner fish market. In *Economics in Nature: Social Dilemmas, Mate*  
584 *Choice and Biological Markets* (ed. Noe R.), Cambridge University Press.
- 585 6. Oldroyd G.E.D., Murray J.D., Poole P.S., Downie J.A. 2011 The rules of engagement in the  
586 Legume-Rhizobial symbiosis. *Annual Review of Genetics* **45**, 119-144.
- 587 7. Dyall S.D., Brown M.T., Johnson P.J. 2004 Ancient invasions: From endosymbionts to  
588 organelles. *Science* **304**.
- 589 8. Damore J.A., Gore J. 2011 A slowly evolving host moves first in symbiotic interactions.  
590 *Evolution* **65**(8), 2391-2398. (doi:10.1111/j.1558-5646.2011.01299.x).
- 591 9. West S.A., Fisher R.M., Gardner A., Kiers T.E. 2015 Major evolutionary transitions in  
592 individuality. *Proceedings of the National Academy of Sciences of the United States of America*.
- 593 10. Nowak M.A., Bonhoeffer S., May R.M. 1994 Spatial games and the maintenance of  
594 cooperation. *Proceedings of the National Academy of Sciences of the United States of America* **91**,  
595 4877-4881.
- 596 11. Doebeli M., Knowlton N. 1998 The evolution of interspecific mutualisms. *Proceedings of the*  
597 *National Academy of Sciences of the United States of America* **95**, 8676-8680.
- 598 12. Lesser M.P., Stat M., Gates R.D. 2013 The endosymbiotic dinoflagellates (*Symbiodinium* sp.)  
599 of corals are parasites and mutualists. *Coral Reefs* **32**, 603-611.
- 600 13. Sachs J.L., Essenberg C.J., Turcotte M.M. 2011 New paradigms for the evolution of beneficial  
601 infections. *Trends in Ecology & Evolution* **26**, 202-209.
- 602 14. Anderson R.M., May R.M. 1982 Coevolution of hosts and parasites. *Parasitology* **85**, 411-  
603 426.
- 604 15. Ebert D., Bull J.J. 2003 Challenging the trade-off model for the evolution of virulence: is  
605 virulence management feasible? *Trends in Microbiology* **11**, 15-20.
- 606 16. Bright M., Bulgheresi S. 2010 A complex journey: transmission of microbial symbionts.  
607 *Nature Reviews Microbiology* **8**, 218-230.
- 608 17. Bull J.J. 1994 Perspective: virulence. *Evolution* **48**, 1423-1437.
- 609 18. Sachs J.L., Mueller U.G., Wilcox T.P., Bull J.J. 2004 The evolution of cooperation. *Quarterly*  
610 *Review of Biology* **79**(2), 135-160.
- 611 19. Frank S.A. 1994 Genetics of mutualism: the evolution of altruism between species. *Journal of*  
612 *Theoretical Biology* **170**, 393-400.
- 613 20. Herre E.A., Knowlton N., Mueller U.G., Rehner S.A. 1999 The evolution of mutualisms:  
614 exploring the paths between conflict and cooperation. *Trends in Ecology & Evolution* **14**.
- 615 21. Ebert D. 2013 The epidemiology and evolution of symbionts with mixed-mode transmission.  
616 *Annual Review of Ecology, Evolution, and Systematics* **44**, 7.1-7.21.
- 617 22. Bull J.J., Molineux I.J., Rice W.R. 1991 Selection of benevolence in a host-parasite system.  
618 *Evolution* **45**, 857-882.
- 619 23. Sachs J.L., Wilcox T.P. 2006 A shift to parasitism in the jellyfish symbiont *Symbiodinium*  
620 *microadriaticum*. *Proceedings of the Royal Society B-Biological Sciences* **273**, 425-429.
- 621 24. Stewart A.D., Logsdon J.M., Kelley S.E. 2005 An empirical study of the evolution of virulence  
622 under both horizontal and vertical transmission. *Evolution* **59**, 730-739.
- 623 25. Dusi E., Gougat-Barbera C., Berendonk T.U., Kaltz O. 2015 Long-term selection experiment  
624 produces breakdown of horizontal transmissibility in parasite with mixed transmission mode.  
625 *Evolution* **69**(4), 1069-1076.

- 626 26. Herre E.A. 1993 Population structure and the evolution of virulence in nematode parasites of  
627 fig wasps. *Science* **259**, 1442-1445.
- 628 27. Brown B.E. 1997 Coral bleaching: causes and consequences. *Coral Reefs* **16**, S129-S138.
- 629 28. Stanley G.D., Swart P.K. 1995 Evolution of the coral-zooxanthellae symbiosis during the  
630 Triassic: a geochemical approach. *Paleobiology* **21**(2), 179-199.
- 631 29. Daly M., Brugler M.R., Cartwright P., Collines A.G., Dawson M.N., Fautin D.G., France S.C.,  
632 McFadden C.S., Opresko D.M., Rodriguez E., et al. 2007 The phylum Cnidaria: A review of  
633 phylogenetic patterns and diversity 300 years after Linnaeus. In *Linnaeus Tercentenary: Progress in*  
634 *Invertebrate Taxonomy* (eds. Zhang Z.Q., Shear W.A.), pp. 127-182, Zootaxa.
- 635 30. Harrison P.L., Wallace C.C. 1990 Reproduction, dispersal and recruitment of scleractinian  
636 corals. In *Ecosystems of the World: Coral Reefs* (ed. Dubinsky Z.), pp. 133-207. New York, Elsevier.
- 637 31. Kerr A.M., Baird A.H., Hughes T.P. 2011 Correlated evolution of sex and reproductive mode  
638 in corals (Anthozoa: Scleractinia). *Proceedings of the Royal Society B-Biological Sciences* **278**, 75-81.
- 639 32. van Oppen M.J.H., Baker A.C., Coffroth M.A., Willis B.L. 2009 Bleaching resistance and the  
640 role of algal endosymbionts. In *Coral Bleaching: Patterns, Processes, Causes and Consequences*  
641 *(Ecological Studies 205)* (eds. van Oppen M.J.H., Lough J.M.). Berlin Heidelberg, Springer-Verlag.
- 642 33. Baird A.H., Guest J.R., Willis B.L. 2009 Systematic and Biogeographical Patterns in the  
643 Reproductive Biology of Scleractinian Corals. *Annual Review of Ecology Evolution and Systematics* **40**,  
644 551-571. (doi:10.1146/annurev.ecolsys.110308.120220).
- 645 34. Hughes T.P., Baird A.H., Bellwood D.R., Card M., Connolly S.R., Folke C., Grosberg R., Hoegh-  
646 Guldberg O., Jackson J.B.C., Kleypas J., et al. 2003 Climate change, human impacts, and the resilience  
647 of coral reefs. *Science* **301**(5635), 929-933.
- 648 35. Hoegh-Guldberg O., Mumby P.J., Hooten A.J., Steneck R.S., Greenfield P., Gomez E., Harvell  
649 C.D., Sale P.F., Edwards A.J., Caldeira K., et al. 2007 Coral reefs under rapid climate change and ocean  
650 acidification. *Science* **318**(5857), 1737-1742. (doi:10.1126/science.1152509).
- 651 36. Marshall P.A., Baird A.H. 2000 Bleaching of corals on the Great Barrier Reef: differential  
652 susceptibilities among taxa. *Coral Reefs* **19**(2), 155-163.
- 653 37. Edmunds P.J., Gates R.D. 2003 Has coral bleaching delayed our understanding of  
654 fundamental aspects of coral-dinoflagellate symbioses? *BioScience* **53**(10), 976-980.
- 655 38. Weis V.M. 2008 Cellular mechanisms of Cnidarian bleaching: stress causes the collapse of  
656 symbiosis. *The Journal of Experimental Biology* **211**, 3059-3066.
- 657 39. Kerr A.M. 2005 Molecular and morphological supertree of stony corals (Anthozoa:  
658 Scleractinia) using matrix representation parsimony. *Biological Reviews* **80**, 1-16.
- 659 40. Kitahara M.V., Cairns S.D., Stolarski J., Blair D., Miller D.J. 2010 A comprehensive  
660 phylogenetic analysis of the Scleractinia (Cnidaria, Anthozoa) based on mitochondrial CO1 sequence  
661 data. *PLoS ONE* **5**(7), e11490. (doi:10.1371/journal.pone.0011490).
- 662 41. Tonk L., Bongaerts P., Sampayo E.M., Hoegh-Guldberg O. 2013 SymbioGBR: a web-based  
663 database of Symbiodinium associated with cnidarian hosts on the Great Barrier Reef. *BMC Ecology*  
664 **13**(7).
- 665 42. Franklin E.C., Stat M., Pochon X., Putnam H.M., Gates R.D. 2012 GeoSymbio: a hybrid, cloud-  
666 based web application of global geospatial bioinformatics and ecoinformatics for Symbiodinium-host  
667 symbioses. *Molecular Ecology Resources* **12**, 369-373.
- 668 43. Ralph P.J., Larkum A.W.D., Kuhl M. 2005 Temporal patterns in effective quantum yield of  
669 individual zooxanthellae expelled during bleaching. *Journal of Experimental Marine Biology and*  
670 *Ecology* **316**, 17-28.
- 671 44. Strahl J., Stolz I., Uthicke S., Vogen N., Noonan S.H.C., Fabricius K.E. 2015 Physiological and  
672 ecological performance differs in four coral taxa at a volcanic carbon dioxide seep. *Comparative*  
673 *Biochemistry and Physiology Part A: Molecular & Integrative Physiology* **184**, 179-186.
- 674 45. Chisolm J.R.M., Gattuso J.P. 1991 Validation of the alkalinity anomaly technique for  
675 investigating calcification and photosynthesis in coral-reef communities. *Limnology and*  
676 *Oceanography* **36**, 1232-1239.



- 677 46. Veal C.J., Carmi M., Fine M., Hoegh-Guldberg O. 2010 Increasing the accuracy of surface area  
678 estimation using single wax dipping of coral fragments. *Coral Reefs* **29**, 893-897.
- 679 47. Thorington G., Margulis L. 1981 Hydra viridis: Transfer of metabolites between Hydra and  
680 symbiotic algae. *Biological Bulletin* **160**, 175-188.
- 681 48. Tonheim S.K., Koven W., Ronnestad I. 2000 Enrichment of Artemia with free methionine.  
682 *Aquaculture* **190**, 223-235.
- 683 49. Wilson K., Li Y., Whan V., Lehnert S., Byrne K., Moore S., Pongsomboon S., Tassanakajon A.,  
684 Rosenberg G., Ballment E., et al. 2002 Genetic mapping of the black tiger shrimp *Penaeus monodon*  
685 with amplified fragment length polymorphism. *Aquaculture* **204**(3-4), 297-309.
- 686 50. Baker A.C., Rowan R. 1997 Diversity of symbiotic dinoflagellates (zooxanthellae) in  
687 scleractinian corals for the Caribbean and Eastern Pacific. In *Proceedings of the 8th International*  
688 *Coral Reef Symposium* (pp. 1301-1306).
- 689 51. Palstra F. 2000 Host-endosymbiont specificity in Acropora corals of the Indo-Pacific?  
690 Townsville, Australia, James Cook University.
- 691 52. Team R.C. 2013 R: A language and environment for statistical computing. (Vienna, R  
692 Foundation for Statistical Computing.
- 693 53. Pinheiro J., Bates D., DebRoy S., Sarkar D., Team R.D.C. 2013 nlme: Linear and nonlinear  
694 mixed effects models. (R package version 3.1-113 ed.
- 695 54. Johnson P.C.D. 2014 Extension of Nakagawa & Schielzeth's R2GLMM to random slopes  
696 models. *Methods in Ecology and Evolution* **5**(9), 944-946.
- 697 55. Green E.A., Davies S.W., Matz M.V., Medina M. 2014 Quantifying cryptic Symbiodinium  
698 diversity with *Orbicella faveolata* and *Orbicella franksi* at the Flower Garden Banks, Gulf of Mexico.  
699 *PeerJ* **2**, e386. (doi:10.7717/peerj.386).
- 700 56. Fu L., Niu B., Zhu Z., Wu S., Li W. 2012 CD-HIT: accelerated for clustering the next generation  
701 sequencing data. *Bioinformatics* **28**, 3150-3152. (doi:10.1093/bioinformatics/bts565).
- 702 57. Quigley K.M., Davies S.W., Kenkel C.D., Willis B.L., Matz M.V., Bay L.K. 2014 Deep-  
703 Sequencing Method for Quantifying Background Abundances of Symbiodinium Types: Exploring the  
704 Rare Symbiodinium Biosphere in Reef-Building Corals. *PLoS ONE* **9**, e94297.  
705 (doi:doi:10.1371/journal.pone.0094297).
- 706 58. Pruitt K.D., Tatusova T., Browh G.R., Maglott D.R. 2012 NCBI Reference Sequences (RefSeq):  
707 current status, new features and genome annotation policy. *Nucleic Acids Research* **40**(D1), D130-  
708 D135.
- 709 59. LaJeunesse T.C. 2005 Species radiations of symbiotic dinoflagellates in the Atlantic and Indo-  
710 Pacific since the Miocene-Pliocene transition. *Molecular Biology and Evolution* **22**, 570-581.
- 711 60. Putnam H.M., Stat M., Pochon X., Gates R.D. 2012 Endosymbiotic flexibility associates with  
712 environmental sensitivity in scleractinian corals. *Proceedings of the Royal Society B: Biological*  
713 *Sciences* **279**, 4352-4361.
- 714 61. Jones A., Berkelmans R., van Oppen M.J.H., Mieog J.C., Sinclair W. 2008 A community change  
715 in the algal endosymbionts of a scleractinian coral following a natural bleaching event: field evidence  
716 of acclimatization. *Proceedings of the Royal Society B-Biological Sciences* **275**, 1359-1365.
- 717 62. Berkelmans R., van Oppen M.J.H. 2006 The role of zooxanthellae in the thermal tolerance of  
718 corals: a 'nugget of hope' for coral reefs in an era of climate change. *Proceedings of the Royal Society*  
719 *B-Biological Sciences* **273**(1599), 2305-2312. (doi:10.1098/rspb.2006.3567).
- 720 63. Little A.F., van Oppen M.J.H., Willis B.L. 2004 Flexibility in algal endosymbioses shapes  
721 growth in reef corals. *Science* **304**(5676), 1492-1494.
- 722 64. Jones A., Berkelmans R. 2010 Potential Costs of Acclimatization to a Warmer Climate:  
723 Growth of a Reef Coral with Heat Tolerant vs. Sensitive Symbiont Types. *Plos One* **5**(5).  
724 (doi:10.1371/journal.pone.0010437).
- 725 65. Cantin N.E., van Oppen M.J.H., Willis B.L., Mieog J.C., Negri A.P. 2009 Juvenile corals can  
726 acquire more carbon from high-performance algal symbionts. *Coral Reefs* **28**(2), 405-414.  
727 (doi:10.1007/s00338-009-0478-8).



- 728 66. Abrego D., Ulstrup K.E., Willis B.L., van Oppen M.J.H. 2008 Species-specific interactions  
729 between algal endosymbionts and coral hosts define their bleaching response to heat and light  
730 stress. *Proceedings of the Royal Society B-Biological Sciences* **275**(1648), 2273-2282.  
731 (doi:10.1098/rspb.2008.0180).
- 732 67. Baird A.H., Bhagooli R., Ralph P.J., Takahashi S. 2009 Coral bleaching: the role of the host.  
733 *Trends in Ecology & Evolution* **24**(1), 16-20. (doi:10.1016/j.tree.2008.09.005).
- 734 68. Kenkel C., Goodbody-Gringley G., Caillaud D., Davies S.W., Bartels E., Matz M. 2013 Evidence  
735 for a host role in thermotolerance divergence between populations of the mustard hill coral (*Porites*  
736 *astreoides*) from different reef environments. *Molecular Ecology* **22**(16), 4335-4348.
- 737 69. Richmond R.H., Hunter C.L. 1990 Reproduction and recruitment of corals - comparisons  
738 among the Caribbean, the tropical Pacific, and the Red-Sea. *Marine Ecology-Progress Series* **60**(1-2),  
739 185-203.
- 740 70. Okubo N., Mezaki T., Nozawa Y., Nakano Y., Lien Y.-T., Fukami H., Hayward D.C., Ball E.E.  
741 2013 Comparative Embryology of Eleven Species of Stony Corals (Scleractinia). *PLoS ONE* **8**(12),  
742 e84115. (doi:doi:10.1371/journal.pone.0084115).
- 743 71. Schwarz J.A., Krupp D.A., Weis V.M. 1999 Late larval development and onset of symbiosis in  
744 the scleractinian coral *Fungia scutaria*. *Biological Bulletin* **196**, 70-79.
- 745 72. Marlow H.Q., Martindale M.Q. 2007 Embryonic development in two species of scleractinian  
746 coral embryos: Symbiodinium localization and mode of gastrulation. *Evolution and Development*  
747 **9**(4), 355-367.
- 748 73. Cumbo V.R., Baird A.H., van Oppen M.J.H. 2013 The promiscuous larvae: flexibility in the  
749 establishment of symbiosis in corals. *Coral Reefs* **32**, 111-120.
- 750 74. Nitschke M.R., Davy S.K., Ward S. 2015 Horizontal transmission of Symbiodinium cells  
751 between adult and juvenile corals is aided by benthic sediment. *Coral Reefs*.  
752 (doi:doi:10.1007/s00338-015-1349-0).
- 753 75. Byler K.A., Carmi-Veal M., Fine M., Goulet T.L. 2013 Multiple symbiont acquisition strategies  
754 as an adaptive mechanism in the coral *Stylophora pistillata*. *PLoS ONE* **8**(3), e59596.
- 755 76. Boulotte N.M., Dalton S.J., Carroll A.G., Harrison P.L., Putnam H.M., Peplow L.M., van Oppen  
756 M.J.H. 2016 Exploring the Symbiodinium rare biosphere provides evidence for symbiont switching in  
757 reef-building corals. *The ISME Journal*, 1-9. (doi:10.1038/ismej.2016.54).
- 758 77. Fabina N.S., Putnam H.M., Franklin E.C., Stat M., Gates R.D. 2012 Transmission mode  
759 predicts specificity and interaction patterns in coral-Symbiodinium networks. *PLoS ONE* **7**(9), e44970.  
760 (doi:doi10.1371/journal.pone.0044970).
- 761 78. Davy S.K., Allemand D., Weis V.M. 2012 Cell biology of Cnidarian-dinoflagellate symbiosis.  
762 *Microbiology and Molecular Biology Reviews* **76**, 229-261.
- 763 79. Muscatine L. 1990 The role of symbiotic algae in carbon and energy flux in reef corals. In  
764 *Ecosystems of the world 25: Coral reefs* (ed. Dubinsky), pp. 75-87. New York, Elsevier.
- 765 80. Yellowlees D., Rees T., Leggat W. 2008 Metabolic interactions between algal symbionts and  
766 invertebrate hosts. *Plant, Cell & Environment* **31**(5), 679-694.
- 767 81. Gordon B.R., Leggat W. 2010 Symbiodinium-invertebrate symbioses and the role of  
768 metabolomics. *Marine Drugs* **8**(10), 2546-2568.
- 769 82. Von Holt C. 1968 Uptake of glycine and release of nucleoside-polyphosphates by  
770 zooxanthellae. *Comparative Biochemistry and Physiology* **26**(3), 1071-1079.
- 771 83. Lin S., Cheng S., Song B., Zhong X., Lin X., Li W., Li L., Zhang Y., Zhang H., Ji Z., et al. 2015 The  
772 Symbiodinium *kawagutii* genome illuminates dinoflagellate gene expression and coral symbiosis.  
773 *Science* **350**(6261), 691-694. (doi:10.1126/science.aad0408).
- 774 84. Grottoli A.G., Rodrigues L.J., Palardy J.E. 2006 Heterotrophic plasticity and resilience in  
775 bleached corals. *Nature* **440**, 1186-1189. (doi:10.1038/nature04565).
- 776 85. Koch E.J., Miyashiro T., McFall-Ngai M.J., Ruby E.G. 2014 Features governing symbiont  
777 persistence in the squid-vibrio association. *Molecular Ecology* **23**(6), 1624-1634.

- 778 86. Kiers T.E., Rosseau R.A., West S.A., Denison R.F. 2003 Host sanctions and the legume-  
779 rhizobium mutualism. *Nature* **425**(6953), 78-81.
- 780 87. Weis V.M., Davy S.K., Hoegh-Guldberg O., Rodriguez-Lanetty M., Pringle J.R. 2008 Cell  
781 biology in model systems as the key to understanding corals. *Trends in Ecology and Evolution* **23**(7),  
782 369-376.
- 783
